# Supplementary material for: A bioinspired bifunctional catalyst: an amphiphilic organometallic catalyst for ring-closing metathesis forming liquid droplets in aqueous media
Source: Royal Society of Chemistry journal article supplement (doi:10.1039/d4cc01117a), 2024-01-01
Supplement: d4cc01117a1.pdf [file d4cc01117a1.pdf]

## Supplementary Information

### **Bioinspired Bifunctional Catalyst: Amphiphilic Organometallic Catalyst for Ring-Closing Metathesis Forming Liquid Droplets in Aqueous Media**

Miki Mori,<sup>a</sup> Hiroka Sugai,<sup>b</sup> Kohei Sato,<sup>a,‡</sup> Asuki Okada,<sup>c</sup> Takashi Matsuo,<sup>c</sup>

and Kazushi Kinbara\*<sup>a, b</sup>

<sup>a</sup>*School of Life Science and Technology, Tokyo Institute of Technology, 4259 Nagatsuta-cho, Midori-ku, Yokohama 226-8501, Japan. E-mail: kinbara.k.aa@m.titech.ac.jp*

<sup>b</sup>*Research Center for Autonomous Systems Materialogy (ASMat), Institute of Innovative Research, Tokyo Institute of Technology, 4259 Nagatsuta-cho, Midori-ku, Yokohama 226-8501, Japan*

<sup>c</sup>*Division of Materials Science, Nara Institute of Science and Technology, 8916-5 Takayama-cho, Ikoma, Nara 630-0192, Japan*

<sup>‡</sup>*Present address: Department of Chemistry, School of Science, Kwansei Gakuin University, 1 Gakuen Uegahara, Sanda-shi, Hyogo 669-1330, Japan*

## Table of Contents

|    |                                                                                        |     |
|----|----------------------------------------------------------------------------------------|-----|
| 1. | General                                                                                | S3  |
| 2. | Materials                                                                              | S3  |
| 3. | Synthesis                                                                              | S4  |
| 1) | Synthesis of <b>7</b>                                                                  | S4  |
| 2) | Synthesis of <b>8</b>                                                                  | S4  |
| 3) | Ion exchange of <b>8</b>                                                               | S5  |
| 4) | Synthesis of <b>MAHGII</b>                                                             | S6  |
| 4. | Analytical data                                                                        | S7  |
| 1) | NMR spectra                                                                            | S7  |
| 2) | High-resolution mass spectrometry                                                      | S11 |
| 5. | Methods                                                                                | S13 |
| 1) | RCM reaction in CD <sub>2</sub> Cl <sub>2</sub>                                        | S13 |
| 2) | Phase contrast microscopy                                                              | S13 |
| 3) | Confocal laser scanning microscopy                                                     | S13 |
| 4) | DLS measurement of <b>MAHGII</b> droplets in 100 mM KCl aq.                            | S13 |
| 5) | DLS measurement of <b>MAHGII</b> droplets in the presence of <b>5</b>                  | S14 |
| 6) | RCM reaction in 100 mM KCl D <sub>2</sub> O in the presence and absence of surfactants | S14 |
| 6. | Supplementary data                                                                     | S15 |
| 7. | References                                                                             | S18 |

## 1. General

Unless otherwise noted, all commercial reagents were used as received.  $^1\text{H}$  and  $^{13}\text{C}$  NMR spectra were recorded on Varian model 400-MR spectrometer or JEOL model JNM-ECZL400S spectrometer operating at 400 MHz for  $^1\text{H}$  and 100 MHz for  $^{13}\text{C}$ . The chemical shifts were determined with respect to tetramethylsilane (TMS) or a residual non-deuterated solvent as an internal reference. Electrospray ionization time-of-flight (ESI-TOF) mass spectrometry was performed on a Bruker model microTOF II spectrometer. High-performance liquid chromatography (HPLC) was performed at room temperature using a 10 mm I.D. x 250 mm or 20 mm I.D. x 250 mm Cosmosil 5SL- II packed column on a Shimadzu HPLC prominence system, equipped with a UV-Vis detector. Dynamic light scattering (DLS) was performed on a Malvern model Zetasizer Nano ZSP spectrophotometer using a disposable plastic micro cuvette (ZEN0040). Confocal laser scanning microscopic observation and phase contrast microscopic observation were carried out on an Olympus model FV1000 microscope. A 0.1 mm thick silicon-based spacer was placed between a cover glass and a coverslip for imaging and micrographs were analyzed using ImageJ.<sup>S1</sup>

## 2. Materials

Potassium hexamethyldisilazide (KHMDs; 0.5 M toluene solution), Grubbs 1<sup>st</sup> Generation catalyst, 1,6-heptadiene-4-ol, Hoveyda-Grubbs 2<sup>nd</sup> generation catalyst (HGII), and Amberlite® IRA 410 chloride form were purchased from Sigma Aldrich. Octaethylene glycol monododecyl ether, diethyl diallylmalonate, and Nile Red were purchased from TCI. *N,N*-diallyl-4-methylbenzenesulfonamide was purchased from BLD Pham. Triton X-100 was purchased from Nacalai Tesque.

### 3. Synthesis

#### 1) Synthesis of **7**

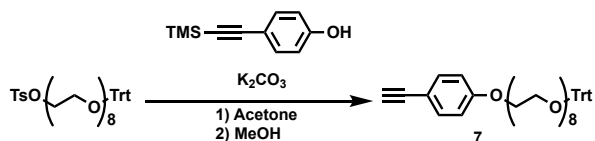

To a solution of Trt-PEG<sub>8</sub>-Ts<sup>S2,S3</sup> (1.43 g, 1.86 mmol) in dry acetone (16 mL) were added 4-((trimethylsilyl)ethynyl)phenol (535 mg, 1.86 mmol) and K<sub>2</sub>CO<sub>3</sub> (1.25 g, 9.04 mmol) at room temperature under Ar, and the resulting mixture was refluxed at 60 °C for 6 h. The reaction mixture was evaporated and dried under reduced pressure. Dry MeOH (14 mL) was added to the residue under Ar, and the resulting solution was stirred at room temperature for 14 h. The reaction mixture was evaporated to dryness under reduced pressure. Sat. NaHCO<sub>3</sub> aq. was added, and the resulting mixture was then extracted with CHCl<sub>3</sub> for three times. The organic extract was dried over anhydrous Na<sub>2</sub>SO<sub>4</sub> and evaporated to dryness under reduced pressure. The crude product was purified by silica gel column chromatography with Hex/EtOAc (2/8 to 0/10) to afford **7** (1.31 g, 1.83 mmol) in quantitative yield. <sup>1</sup>H NMR (400 MHz, CDCl<sub>3</sub> containing 0.03% TMS) δ 7.47-7.44 (m, 6H), 7.40 (d, *J* = 8.8 Hz, 2H), 7.30-7.26 (m, 6H), 7.21 (t, *J* = 7.2 Hz, 3H), 6.84 (d, *J* = 8.8 Hz, 2H), 4.10 (t, *J* = 4.6 Hz, 2H), 3.83 (t, *J* = 4.6 Hz, 2H), 3.72-3.61 (m, 26H), 3.23 (t, *J* = 5.2 Hz, 2H), 2.99 (s, 1H) ppm; <sup>13</sup>C NMR (100 MHz, CDCl<sub>3</sub> containing 0.03% TMS) δ 159.0, 144.0, 133.4, 128.8, 128.6, 127.6, 126.8, 114.4, 114.2, 86.4, 83.5, 77.2, 75.8, 70.7, 70.6, 70.6, 70.5, 70.5, 70.4, 69.5, 67.3, 63.2 ppm; HRMS (ESI-TOF-MS) *m/z* calculated for C<sub>43</sub>H<sub>52</sub>O<sub>9</sub>Na [M+Na]<sup>+</sup>: 735.3504; found: 735.3525.

#### 2) Synthesis of **8**

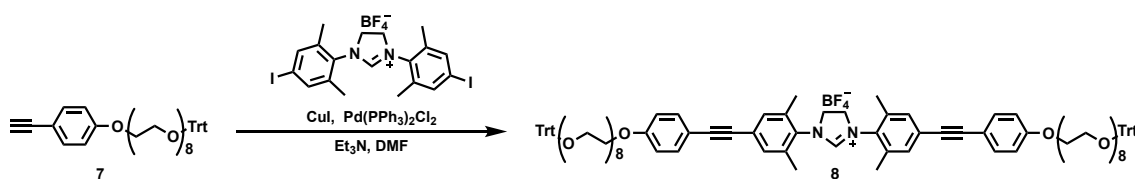

To a degassed solution of **7** (502 mg, 0.70 mmol) in a mixture of dry Et<sub>3</sub>N (2.8 mL) and dry DMF (2.0 mL) were added Pd(PPh<sub>3</sub>)<sub>2</sub>Cl<sub>2</sub> (17 mg, 0.024 mmol), CuI (5 mg, 0.026 mmol), and 1,3-bis(4-iodo-2,6-dimethylphenyl)-4,5-dihydro-1*H*-imidazol-3-ium tetrafluoroborate (162 mg, 0.26 mmol) under Ar and the resulting mixture was stirred for 2.5 h at room temperature. The reaction mixture was dried under reduced pressure and the residue was subjected to column chromatography on silica gel with CHCl<sub>3</sub>/MeOH (96/4). The brown gummy crude product was purified by normal phase HPLC to afford **8** in 91% yield (426 mg, 0.24 mmol). <sup>1</sup>H NMR(400 MHz, CDCl<sub>3</sub> containing 0.03% TMS, 25 °C) δ 8.66 (s, 1H), 7.50-7.43 (m, 16H), 7.32-7.20 (m, 22H), 6.90 (d, *J* = 8.8 Hz, 4H), 4.75 (br, 4H), 4.14 (t, *J* = 4.8 Hz, 4H), 3.86 (t, *J* = 4.6 Hz, 4H), 3.75-3.61 (m, 52H), 3.22 (t, *J* = 5.2 Hz, 4H), 2.47 (s, 12H) ppm; <sup>13</sup>C NMR (101 MHz, CDCl<sub>3</sub> containing 0.03% TMS, 25°C) δ 159.1, 158.3, 143.9, 135.5, 133.1, 131.9, 131.7, 128.5, 127.6, 126.8, 125.9, 114.6, 91.4, 86.7, 86.3, 77.2, 70.7, 70.6, 70.5, 70.5, 70.4, 70.4, 69.4, 67.3, 63.1, 52.2, 18.5 ppm; HRMS (ESI-TOF-MS) *m/z* calculated for C<sub>105</sub>H<sub>123</sub>N<sub>2</sub>O<sub>18</sub> [M-BF<sub>4</sub>]<sup>+</sup>: 1699.8765; found:1699.8787.

### 3) Ion exchange of **8**

The Amberlite® IRA-410 chloride form (16 g) was sequentially washed with H<sub>2</sub>O, sat. NH<sub>4</sub>BF<sub>4</sub> aq., and H<sub>2</sub>O. Then the eluent was exchanged to H<sub>2</sub>O/acetone/MeOH (1/1/1), and subsequently to acetone/MeOH (1/1). Then, the acetone/MeOH (1/1) solution of **8** (310 mg) was flushed through the resin. The solvent was evaporated and dried under reduced pressure to afford 278 mg of ion exchanged **8**.

#### 4) Synthesis of MAHGII

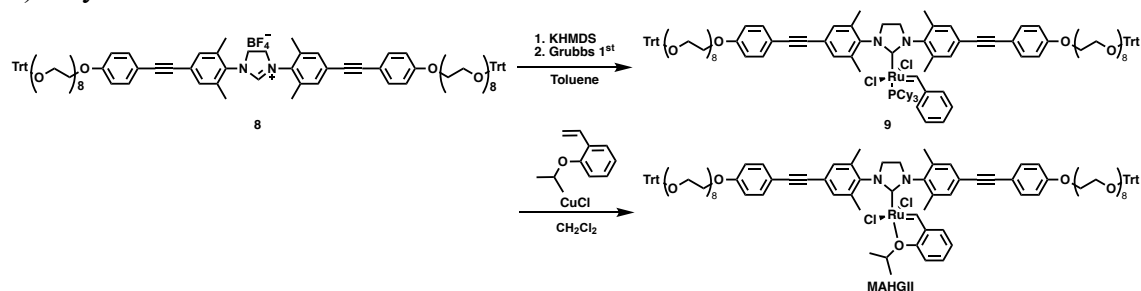

Compound **8** (278 mg) was dried overnight with molecular sieve 3A in dry  $\text{CH}_2\text{Cl}_2$  (6 mL) under Ar. The resulting solution was transferred to a Schlenk flask using cannula, which was dried under reduced pressure and lyophilized prior to use. Then, to a solution of **8** (278 mg, 0.16 mmol) in dry toluene (1.0 mL) in a Schlenk flask was added 0.5 M KHMDS in dry toluene (0.35 mL, 0.18 mmol), and the resulting mixture was stirred for 5 min at room temperature under Ar. To the reaction mixture was added Grubbs 1<sup>st</sup> generation catalyst (121 mg, 0.15 mmol), and the resulting mixture was stirred at 50 °C for 3 h under a gentle stream of Ar. After the solvent was evaporated, the residue was dried under reduced pressure and subjected to column chromatography on silica gel with  $\text{CHCl}_3/\text{MeOH}$  (98/2) and to afford a red gummy crude product containing **9**. While the  $^1\text{H}$  NMR spectrum of the crude mixture suggested the presence of **9** and a byproduct (hydrolyzed compound of **8** generated from unreacted carbene), this mixture was used without further purification. To a solution of the crude mixture of **9** (233 mg) in dry  $\text{CH}_2\text{Cl}_2$  (5 mL) were added 2-isopropoxystyrene (46 mg, 0.28 mmol) and  $\text{CuCl}$  (22 mg, 0.22 mmol), and the resulting mixture was refluxed at 45 °C for 1.5 h under Ar. The solvent was evaporated to dryness under reduced pressure. The resulting residue was subjected to column chromatography on silica gel with  $\text{CHCl}_3/\text{MeOH}$  (98/2). The gummy product was further purified by normal phase HPLC to allow isolation of MAHGII (52 mg, 0.026 mmol) as a green gummy solid in 17% yield over 2 steps.  $^1\text{H}$  NMR (400 MHz,

CDCl<sub>3</sub> containing 0.03% TMS)  $\delta$  16.59 (s, 1H), 7.52-7.44 (m, 17H), 7.42 (s, 4H), 7.33-7.27 (m, 12H), 7.24-7.18 (m, 6H), 7.05-7.03 (dd,  $J = 7.6$  Hz, 1.2 Hz 1H), 6.93-6.86 (m, 5H), 6.80 (d,  $J = 8.4$  Hz, 1H), 4.96-4.89 (m, 1H), 4.19-4.13 (m, 8H), 3.88 (t,  $J = 4.8$  Hz, 4H), 3.75-3.56 (m, 52H), 3.23 (t,  $J = 5.2$  Hz, 4H), 2.52 (br, 12H), 1.32 (d,  $J = 6.4$  Hz, 6H) ppm; <sup>13</sup>C NMR, (101 MHz, CDCl<sub>3</sub> containing 0.03% TMS)  $\delta$  212.1, 158.9, 152.3, 145.1, 144.0, 133.1, 131.5, 129.8, 128.6, 127.7, 126.8, 124.3, 123.0, 122.4, 115.3, 114.6, 112.8, 90.0, 87.7, 86.4, 77.2, 75.2, 70.8, 70.7, 70.6, 70.6, 70.5, 70.5, 70.5, 69.5, 67.4, 63.2, 51.3, 21.1, 19.4 ppm; HRMS (ESI-TOF-MS)  $m/z$  calculated for C<sub>115</sub>H<sub>134</sub>Cl<sub>2</sub>N<sub>2</sub>O<sub>19</sub>RuNa [M+Na]<sup>+</sup>: 2041.7894; found: 2041.7882.

#### 4. Analytical data

##### 1) NMR spectra

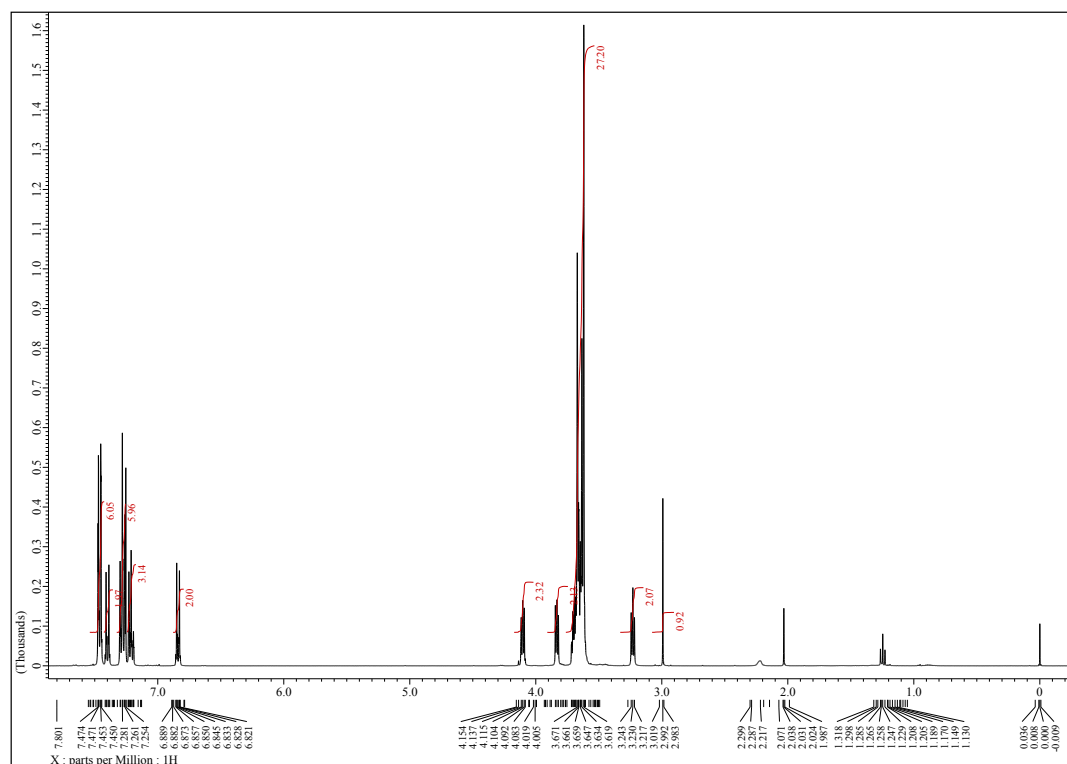

Fig. S1 <sup>1</sup>H NMR spectrum of 7 in CDCl<sub>3</sub>.

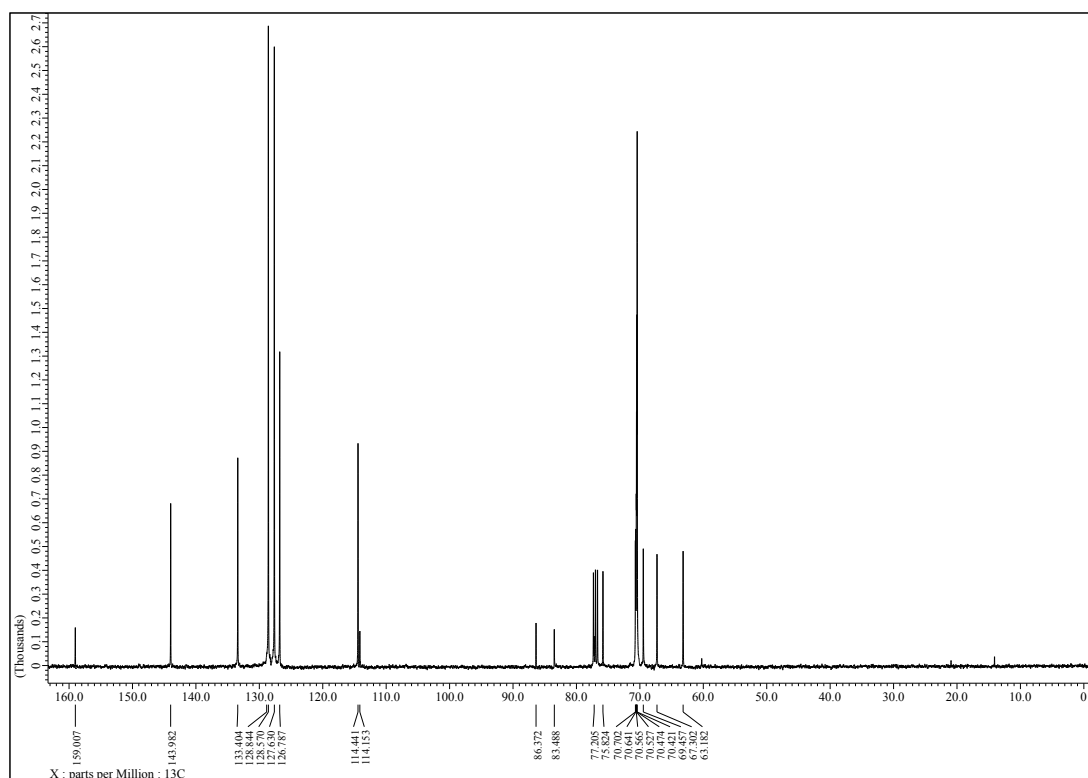

Fig. S2 <sup>13</sup>C NMR spectrum of 7 in CDCl<sub>3</sub>.

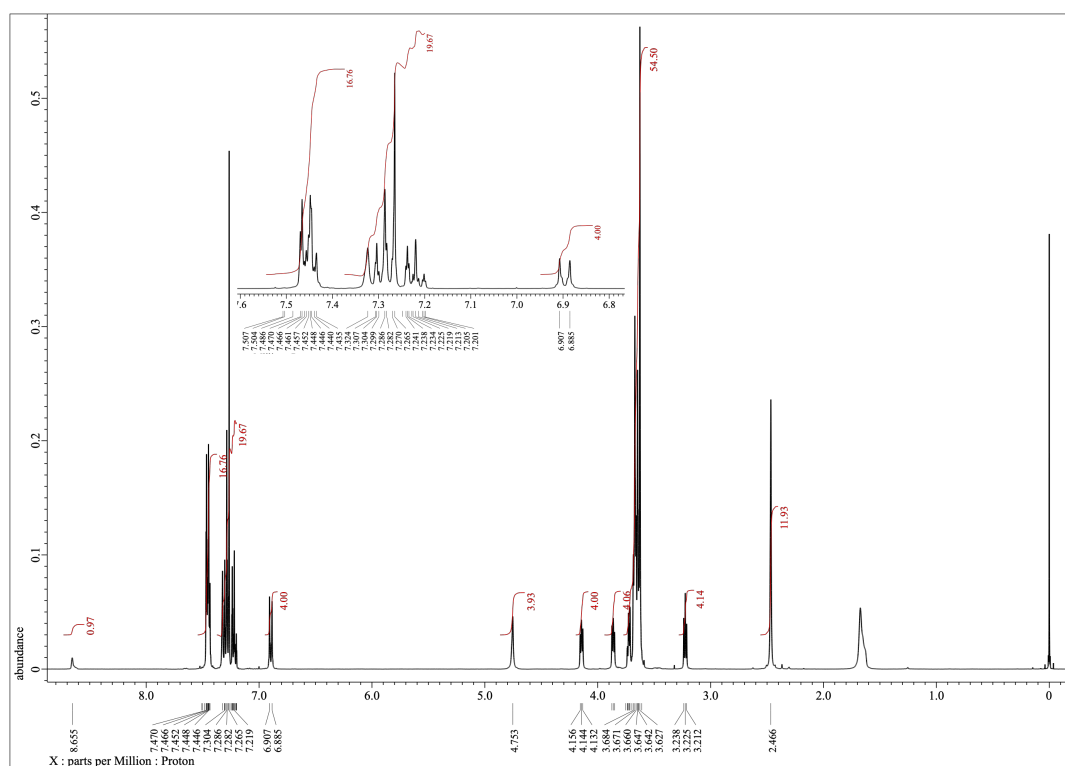

Fig. S3 <sup>1</sup>H NMR spectrum of 8 in CDCl<sub>3</sub>.



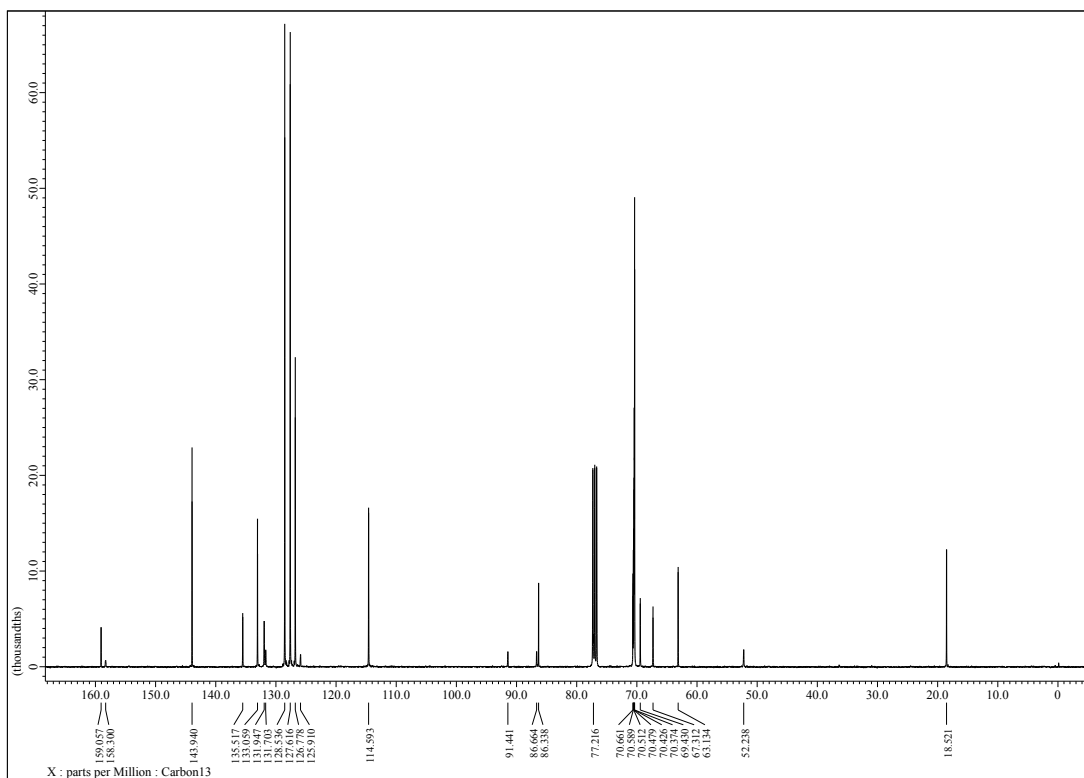

Fig. S4  $^{13}\text{C}$  NMR spectrum of **8** in  $\text{CDCl}_3$ .

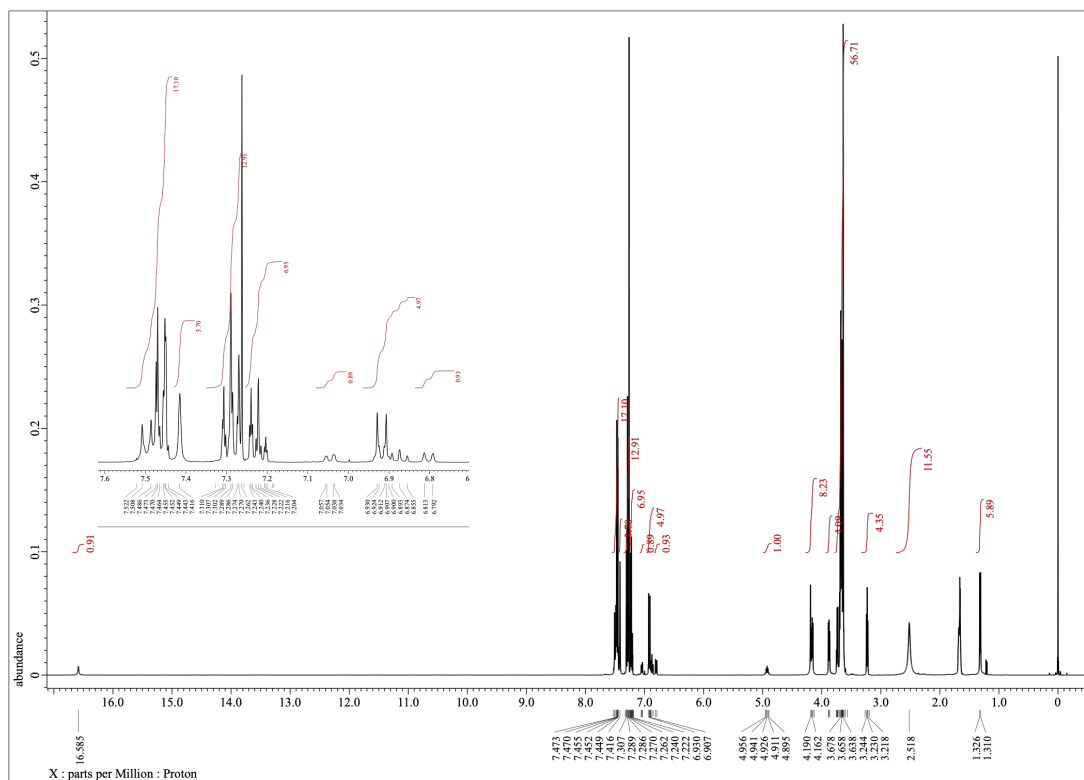

Fig. S5  $^1\text{H}$  NMR spectrum of MAHGII in  $\text{CDCl}_3$ .

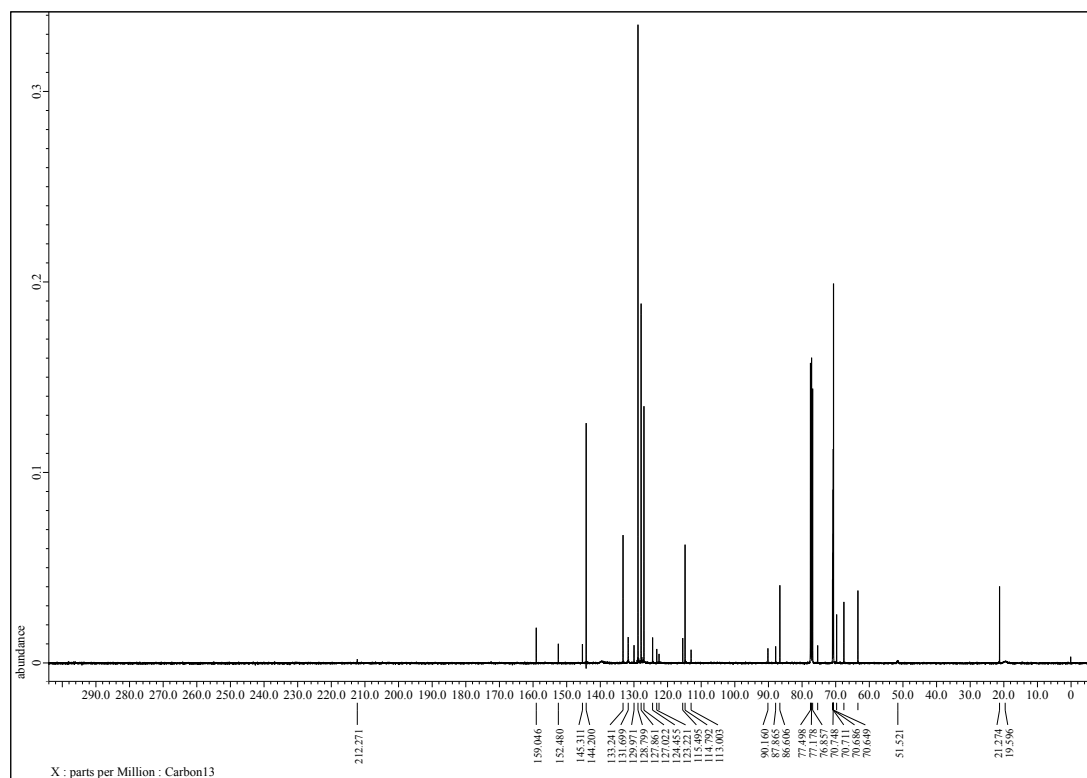

**Fig. S6**  $^{13}\text{C}$  NMR spectrum of MAHGII in  $\text{CDCl}_3$ .

## 2) High-resolution mass spectrometry

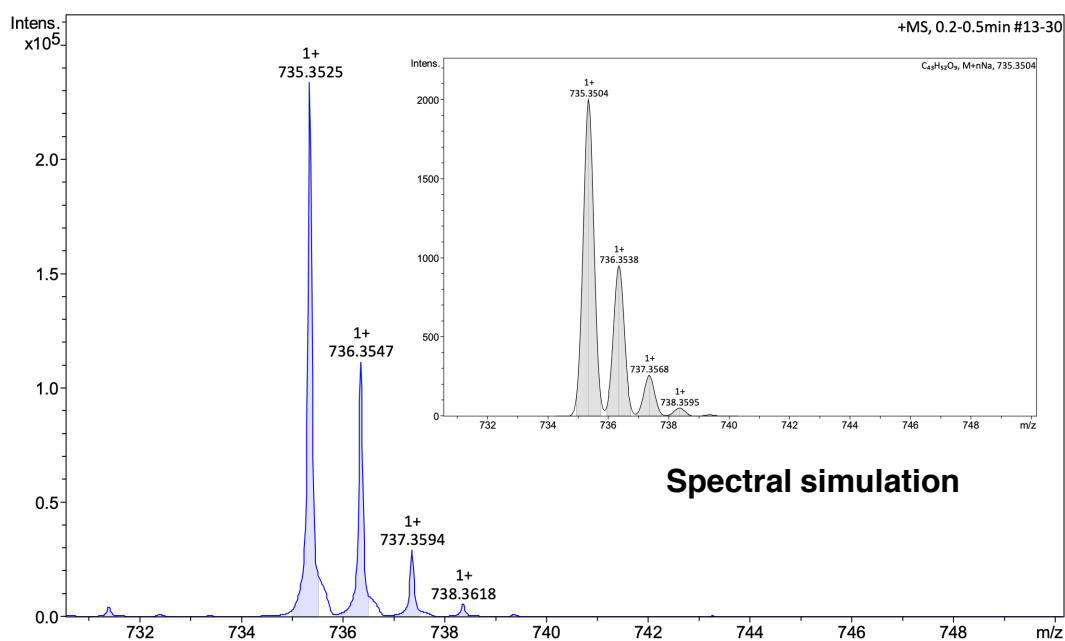

**Fig. S7** High-resolution ESI-TOF-MS spectrum of **7** and simulated spectrum (inset).

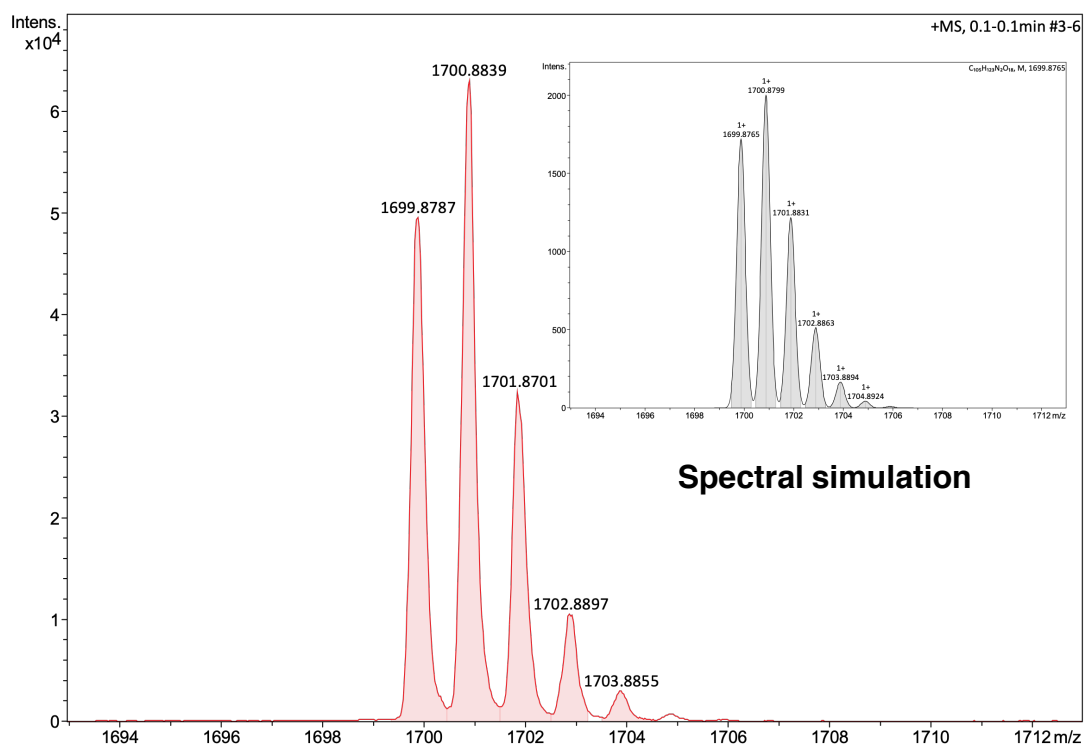

**Fig. S8** High-resolution ESI-TOF-MS spectrum of **8** and simulated spectrum (inset).

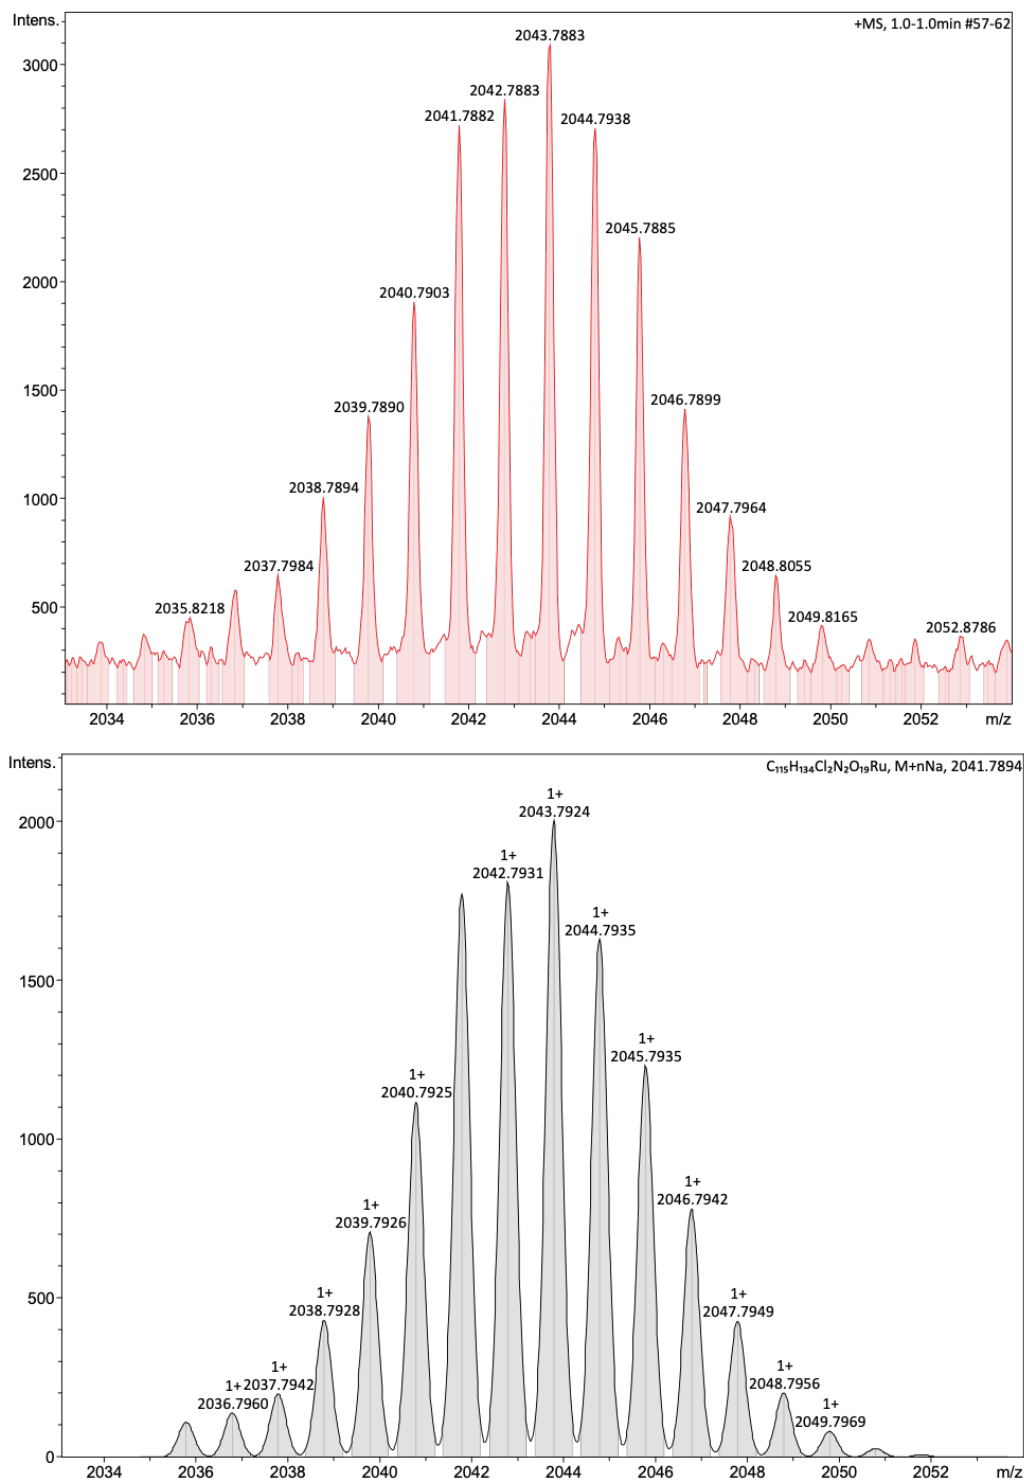

**Fig. S9** High-resolution ESI-TOF-MS spectrum of **MAHGII** (top) and spectral simulation (bottom).

## 5. Methods

### 1) RCM reaction in CD<sub>2</sub>Cl<sub>2</sub>

To CD<sub>2</sub>Cl<sub>2</sub> (400 μL) in an NMR tube was added a 50 mM CD<sub>2</sub>Cl<sub>2</sub> solution (50 μL) of substrate and a 500 μM CD<sub>2</sub>Cl<sub>2</sub> solution (50 μL) of a catalyst so that the final concentrations of substrate and catalyst were 5 mM and 50 μM, respectively. The reaction was monitored by <sup>1</sup>H NMR spectroscopy at room temperature under open air.

### 2) Phase contrast microscopy

To a mixture of 100 mM KCl aq. (200 μL) with 0.5 v/v% DMF was added a DMF solution (1 μL) of 40 mM **MAHGII** under stirring. The mixture was deposited on a glass slip with a silicone spacer and sandwiched with another cover glass slip for time-lapse imaging.

### 3) Confocal laser scanning microscopy

To an aqueous solution of 100 mM KCl (200 μL) was added a DMF solution (1 μL) of 40 mM **MAHGII** under stirring. 100 μL of the resulting dispersion was transferred to a vial followed by addition of 2 mM DMF solution (0.5 μL) of Nile Red. The mixture was deposited on a glass slip with a silicone spacer and sandwiched with another cover glass slip for the confocal laser microscopic observation at  $\lambda_{\text{ex}} = 559 \text{ nm}$ ,  $\lambda_{\text{obsd}} = 612 \text{ nm}$ .

### 4) DLS measurement of **MAHGII** droplets in 100 mM KCl aq.

To an aqueous solution of 100 mM KCl (150 μL) containing 0 or 2 mM surfactant was added a DMF solution (1.5 μL) of 20 mM **MAHGII** under stirring. The resulting suspension was transferred to a 40 μL disposable plastic microcuvette, and an intensity-based particle size profile was obtained.

5) DLS measurement of **MAHGII** droplets in the presence of 1,6-heptadien-4-ol (**5**)

To an aqueous solution of 100 mM KCl (200  $\mu$ L) was added a DMF solution (1  $\mu$ L) of 40 mM **MAHGII**, followed by addition of a DMF solution (1  $\mu$ L) of **5** (1 M) under stirring at room temperature. The resulting suspension was transferred to a 40  $\mu$ L disposable plastic microcuvette, and an intensity-based particle size profile was obtained.

6) RCM reaction in 100 mM KCl D<sub>2</sub>O in the presence and absence of surfactants

To a 0, 1, 2, or 4 mM solution (500  $\mu$ L) of a surfactant in 100 mM KCl D<sub>2</sub>O was added a DMF solution (2.5  $\mu$ L) of 40 mM **MAHGII** or **HGII** and the resulting mixtures were stirred for 10 min at room temperature. To the resulting mixture was added 1 M DMF solution (2.5  $\mu$ L) of **5** and the resulting suspension was heated to 50 °C for 4 h on the water bath under open air without stirring. The reaction mixture was cooled down to room temperature and transferred to an NMR tube for <sup>1</sup>H NMR spectroscopy. The conversions for the reactions were calculated based on the relative integration values of allylic protons of **5** and **6**, where other compounds than the starting material and RCM product were not detected.

## 6. Supplementary data

### 1) Catalytic activity of **HGII** in $\text{CD}_2\text{Cl}_2$

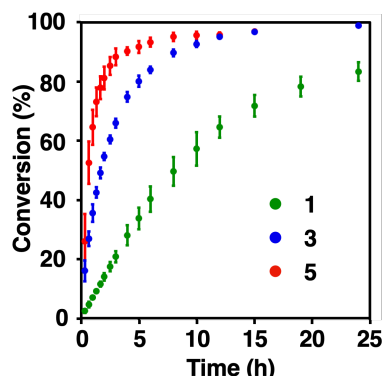

**Fig. S10** Time versus conversion profile of RCM reaction of **1** (green), **3** (blue) and **5** (red) catalyzed by commercially available Hoveyda-Grubbs 2<sup>nd</sup> generation catalyst (**HGII**) under the same reaction conditions for that with **MAHGII** described in the main text. [**HGII**] = 50  $\mu\text{M}$ , [substrates] = 5 mM in  $\text{CD}_2\text{Cl}_2$  at room temperature. All reactions were performed in triplicate and the error bars represent the standard deviation.

### 2) Distribution of Nile Red in **MAHGII** droplets.

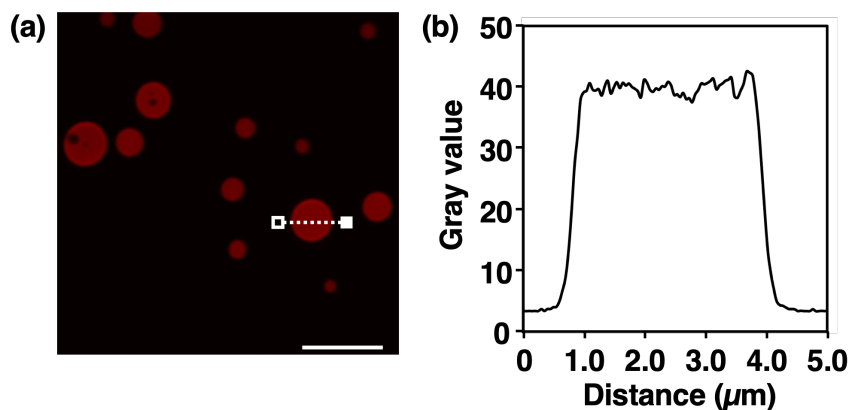

**Fig. S11** (a) Confocal laser scanning microscopic image of Nile Red accumulated in **MAHGII** droplets. [**MAHGII**] = 200  $\mu\text{M}$ , [Nile Red] = 10  $\mu\text{M}$  in 100 mM KCl aq. with 1 v/v% DMF. Scale bar: 5  $\mu\text{m}$ . (b) Gray values of Nile Red emission obtained along the white dotted line from the empty to filled squares in (a).

3) Microscopic image of **MAHGII** droplets in the presence of substrate **5**.

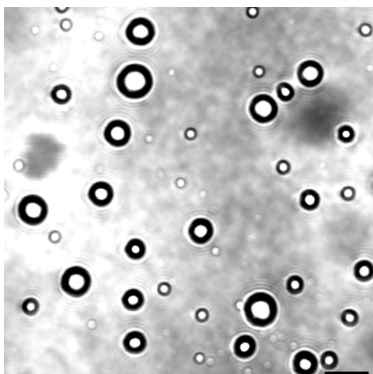

**Fig. S12** Phase contrast micrograph of **MAHGII** droplet in the presence of **5**.  
[**MAHGII**] = 200  $\mu$ M, [**5**] = 5 mM in 100 mM KCl aq. with 1 v/v% DMF.

4) DLS profiles of substrate **5** and a mixture of **MAHGII** and **5**

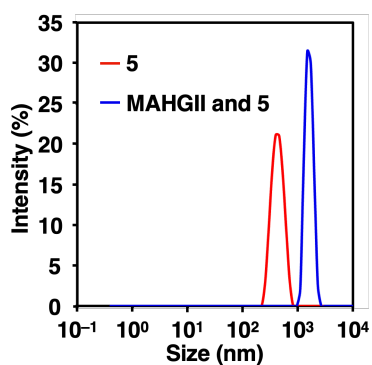

**Fig. S13** DLS profile of substrate **5** (red) and **MAHGII** in the presence of **5**.  
[**MAHGII**] = 200  $\mu$ M, [**5**] = 5 mM in 100 mM KCl aq. with 1 v/v% DMF.



5) Catalytic activity of **HGII** in the presence and absence of surfactants in aqueous environments

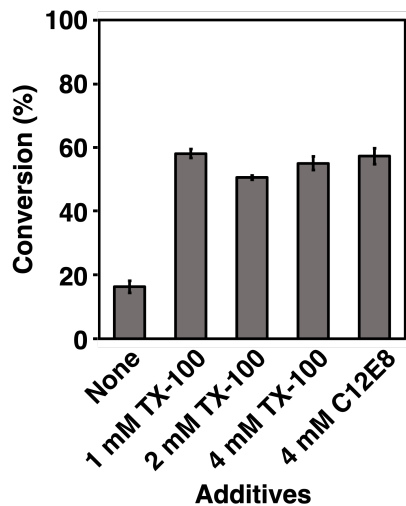

**Fig. S14** Conversions for RCM reactions of **5** catalyzed by **HGII** in the presence and absence of surfactants in 100 mM KCl D<sub>2</sub>O with 1 v/v% DMF.

6) <sup>1</sup>H NMR spectra of RCM reactions of **5** in CDCl<sub>3</sub>

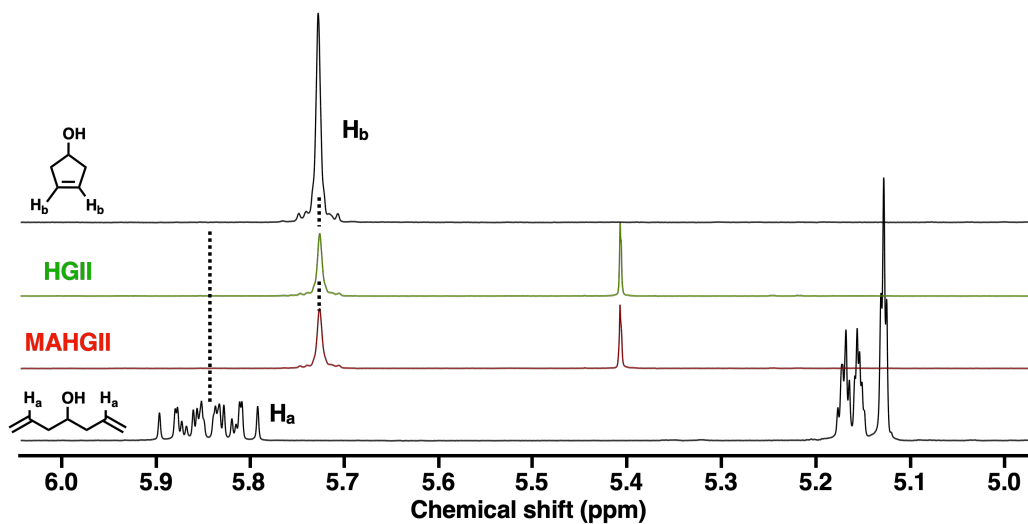

**Fig. S15** <sup>1</sup>H NMR spectra after RCM reaction of 5 mM substrate **5** with 4 mol% **MAHGII** (red) or **HGII** (green) in CDCl<sub>3</sub> at 50 °C for 4 h without stirring under open air. The spectra at the bottom and the top show the chemical shifts of allylic protons of substrate (**5**) and product (**6**), respectively with the indication of allylic protons H<sub>a</sub> and H<sub>b</sub> at the left of spectra, which were used to evaluate the conversions.

## 7. References

- S1 W. S. Rasband, *ImageJ*, U. S. National Institutes of Health, Bethesda, Maryland, USA, <http://rsb.info.nih.gov/ij/>, 1997-2012.
- S2 A. M. Wawro, T. Muraoka and K. Kinbara, *Polym. Chem.* 2016, **7**, 2389–2394.
- S3 A. M. Wawro, T. Muraoka, M. Kato and K. Kinbara, *Org. Chem. Front.* 2016, **3**, 1524–1534.
